# Supplementary material
Source: publisher figshare collection journal article supplement (https://karger.figshare.com/articles/dataset/_/4748059)
Supplement: Supplementary file 1 [file 1]

# MeDALL

## Mechanism of the Development of Allergy

Parental Questionnaire  
(for parents of 14-18 year old children)

If parts or all of this questionnaire will be used, please refer to the origins of this questionnaire in all corresponding publications (see Supplement Fig. S4).

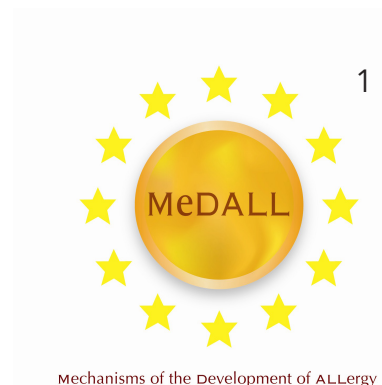

### I) ASTHMA/WHEEZING

#### Core Questions

- 1 Has your child had wheezing or whistling in the chest **in the past 12 months**?  
☐ Yes ☐ No
- 2 How many attacks of wheezing has your child had **in the past 12 months**?  
☐ None ☐ 1 to 3 ☐ 4 to 12 ☐ More than 12
- 3 Has your child **ever** been diagnosed by a doctor as having asthma?  
☐ Yes ☐ No
- 4 Has your child had a doctors diagnosis of asthma **in the past \_\_\_\_ years**  
*[each cohort should ask for time period not covered by this question since last follow-up]?*  
☐ Yes ☐ No
- 5 In the **past 12 months**, how often, on average, has your child's **sleep** been disturbed due to wheezing?  
☐ Never woken with wheezing  
☐ Less than one night per week  
☐ One or more nights per week
- 6 In the **past 12 months**, has wheezing ever been severe enough to limit your child's **speech** to only one or two words at a time between breaths?  
☐ Yes ☐ No
- 7 In the **past 12 months**, has your child's chest sounded wheezy during or after **exercise**?  
☐ Yes ☐ No

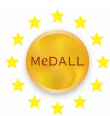

- 8** In the **past 12 months**, has your child had a **dry cough at night**, apart from a cough associated with a cold or chest infection?

☐ Yes ☐ No

---

- 9** Did your child take any medicines for asthma or breathing difficulties (wheezing, chest tightness, shortness of breath) **in the last 12 months**?

**(1) Prescription medication**

☐ Yes ☐ No **If yes**, which? \_\_\_\_\_

- If your child took oral cortical steroids, did he/she take them for at least **3 days** in a row?

☐ Yes ☐ No

**(2) Non-prescription medication**

☐ Yes ☐ No **If yes**, which? \_\_\_\_\_

---

- 10** How often did you have to see a doctor or attend a hospital with your child **urgently** because of breathing difficulties (wheezing, chest tightness, shortness of breath) **in the last 12 months**?

Number: \_\_\_\_\_

---

**Supplemental Questions**

- S1** If your child received asthma medication, how often did he/she take a relieving medication (e.g. ...) during a **regular week**?

☐ Less than 2 times a week  
☐ 2 times or more a week

---

- S2** Has your child **ever** been treated for **wheezing/breathing difficulties** (chest tightness, shortness of breath) with so called alternative methods (such as homoeopathy, acupuncture, others)?

☐ Yes ☐ No

- **If yes**, treatment with \_\_\_\_\_ started at age \_\_ years and ended at \_\_ years.  
- Treatment with \_\_\_\_\_ started at age \_\_ years and ended at \_\_ years.  
- Treatment with \_\_\_\_\_ started at age \_\_ years and ended at \_\_ years

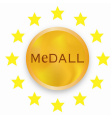

**S3** In the past 12 months, which of these factors do you think triggered your child's wheezing or whistling in the chest? (You might choose several answers. )

- |                                                                |                                                     |
|----------------------------------------------------------------|-----------------------------------------------------|
| <input type="radio"/> Weather change (coldness, fog)           | <input type="radio"/> Tobacco smoke                 |
| <input type="radio"/> Pollen                                   | <input type="radio"/> Emotion, stress               |
| <input type="radio"/> Gas exhaust, vapours, fumes              | <input type="radio"/> Tears, laughter, excitation   |
| <input type="radio"/> Dust                                     | <input type="radio"/> Wool clothes                  |
| <input type="radio"/> Pets                                     | <input type="radio"/> Food or drink                 |
| <input type="radio"/> Cold, flu or other respiratory infection | <input type="radio"/> Soap, spray, cleaning product |
| <input type="radio"/> Strong odours                            | <input type="radio"/> Exercise (during or after)    |

☐ Other (please specify): \_\_\_\_\_

---

**S4** In the last 12 months, has your child usually seemed congested in the chest or coughed up phlegm (mucus) when he/she did not have a cold?

- ☐ Yes      ☐ No
- 

**S5** Does your child seem congested in the chest or cough up phlegm (mucus) on most days (4 or more days a week) for as much as 3 months of the year?

- ☐ Yes      ☐ No



## II) RHINITIS

### Core Questions

---

- 11** In the **past 12 months**, has your child had problems with sneezing, or a runny, or blocked nose when he/she DID NOT have a cold or the flu?
- ☐ Yes      ☐ No
- 
- 12** If yes, please specify which of the symptoms your child had **in the past 12 months** when he/she DID NOT have a cold or the flu (You may choose several answers) Please tick all items that apply:
- |              |                           |                          |
|--------------|---------------------------|--------------------------|
| sneezing     | <input type="radio"/> Yes | <input type="radio"/> No |
| runny nose   | <input type="radio"/> Yes | <input type="radio"/> No |
| blocked nose | <input type="radio"/> Yes | <input type="radio"/> No |
- 
- 13** If yes, **in the past 12 months**, has this nose problem been accompanied by itchy-watery eyes?
- ☐ Yes      ☐ No
- 
- 14** In which of the **past 12 months** did this nose problem occur? (You may choose several answers) Please tick all months that apply:
- |                                |                             |                                 |                                |
|--------------------------------|-----------------------------|---------------------------------|--------------------------------|
| <input type="radio"/> January  | <input type="radio"/> April | <input type="radio"/> July      | <input type="radio"/> October  |
| <input type="radio"/> February | <input type="radio"/> May   | <input type="radio"/> August    | <input type="radio"/> November |
| <input type="radio"/> March    | <input type="radio"/> June  | <input type="radio"/> September | <input type="radio"/> December |
- 
- 15** In the **past 12 months**, did your child have trouble with the nose or eyes (without having a cold) in association with one of the following? (You may choose several answers) Please tick all items that apply:
- ☐ animals
  - ☐ grass, trees, flowers
  - ☐ housedust, mite
  - ☐ tobacco smoke or heavy scent
  - ☐ air pollutants
  - ☐ other, please specify \_\_\_\_\_
- 
- 16** Did your child take any medications against nasal allergy/hay fever/allergic rhinitis **in the past 12 months**?
- 1) Prescription medication**
- ☐ Yes      ☐ No      If yes, which? \_\_\_\_\_
- 2) Non-prescription medication**
- ☐ Yes      ☐ No      If yes, which? \_\_\_\_\_



**17** Did your child **ever** receive special injections against allergy ? ("allergy vaccine", immunotherapy, hyposensitization, desensitization, sublingual drops or tablets)

☐ Yes ☐ No

- If yes, first treatment started at age \_\_ years and ended at \_\_ years

☐ Against which allergen(s) \_\_\_\_\_ ☐ Not known

- Second treatment started at age \_\_ years and ended at \_\_ years

☐ Against which allergen(s) \_\_\_\_\_ ☐ Not known

- Third treatment started at age \_\_ years and ended at \_\_ years

☐ Against which allergen(s) \_\_\_\_\_ ☐ Not known

---

### Supplemental Questions

**S6** Was your child **ever** treated for nasal allergy/hay fever/allergic rhinitis with so called alternative methods (such as homoeopathy, acupuncture, others)?

☐ Yes ☐ No

- If yes, treatment with \_\_\_\_\_ started at age \_\_ years and ended at \_\_ years

- Treatment with \_\_\_\_\_ started at age \_\_ years and ended at \_\_ years

- Treatment with \_\_\_\_\_ started at age \_\_ years and ended at \_\_ years

---

## III) ECZEMA

### Core Questions

---

**18** Has your child had dry skin **in the past 12 months**?

☐ Yes ☐ No

---

**19** Has your child had an itchy rash at any time **in the past 12 months**?

☐ Yes ☐ No

---

**20** Has this itchy rash at any time affected any of the following places (You may choose several answers)? Please tick all items that apply:

- ☐ the folds of the elbows
  - ☐ behind the knees
  - ☐ in front of the ankles
  - ☐ under the buttocks
  - ☐ or around the neck, ears or face?
- 

**21** Has this rash cleared completely at any time during **the past 12 months**?

☐ Yes ☐ No



- 22** Has your child ever been diagnosed by a doctor as having eczema/ atopic dermatitis/ neurodermatitis?
- ☐ Yes ☐ No
- 
- 23** In which of **the past 12 months** did your child's eczema/itchy rash occur? (You may choose several answers) Please tick all months that apply:
- |                                |                             |                                 |                                |
|--------------------------------|-----------------------------|---------------------------------|--------------------------------|
| <input type="radio"/> January  | <input type="radio"/> April | <input type="radio"/> July      | <input type="radio"/> October  |
| <input type="radio"/> February | <input type="radio"/> May   | <input type="radio"/> August    | <input type="radio"/> November |
| <input type="radio"/> March    | <input type="radio"/> June  | <input type="radio"/> September | <input type="radio"/> December |
- 
- 24** **In the past 12 months**, how often, on average, has your child been kept awake at night by this itchy rash?
- ☐ Never in the past 12 months  
☐ Less than one night per week  
☐ One or more nights per week
- 
- 25** Has your child **ever** had eczema on her/his hands (itchy lesions, blisters, rash)?
- ☐ Yes ☐ No
- If yes, at which age was the onset? \_ \_ years (age in years)
- 
- 26** Has your child **ever** had eczema after contact with (you may choose several answers, please tick all items that apply):
- ☐ items of metal (e.g. button, buckle, zipper, belt, watch or watchstrap, glasses or sun glasses, hair slide, cell phone, headset): please specify \_\_\_\_\_
  - ☐ fashion jewellery
  - ☐ hair dye
  - ☐ other colourants
  - ☐ tatoos
  - ☐ cosmetics, perfume or fragrances
  - ☐ deodorant
  - ☐ shampoo or conditioner
  - ☐ soap
  - ☐ clothes
  - ☐ latex, rubber (e.g. rubber gloves, balloons, preservatives)
  - ☐ other materials, please specify: \_\_\_\_\_
  - ☐ **no**, not with any material
- 

### Supplemental Questions

- S5** Was your child **ever** treated for nasal allergy/hay fever/allergic rhinitis with so called alternative methods (such as homoeopathy, acupuncture, others)?
- ☐ Yes ☐ No
- If yes, treatment with \_\_\_\_\_ started at age \_ \_ years and ended at \_ \_ years  
- Treatment with \_\_\_\_\_ started at age \_ \_ years and ended at \_ \_ years  
- Treatment with \_\_\_\_\_ started at age \_ \_ years and ended at \_ \_ years



## IV) SOCIODEMOGRAPHIC CHARACTERISTICS

### Core Questions

27 Your child is

☐ male ☐ female

---

28 Are you single parent?

☐ Yes ☐ No

---

29 Has the mother **ever** had **eczema** (excluding contact dermatitis and psoriasis)?

☐ Yes ☐ No If yes, ☐ doctor diagnosed  
☐ self-diagnosed  
☐ doctor- and self-diagnosed

If yes, how old were you at the onset of your eczema? \_\_\_\_\_years

---

30 Has the mother **ever** had **asthma**?

☐ Yes ☐ No If yes, ☐ doctor diagnosed  
☐ self-diagnosed  
☐ doctor- and self-diagnosed

If yes, how old were you at the onset of your asthma? \_\_\_\_\_years

---

31 Has the mother **ever** had hayfever or **allergic rhinitis**?

☐ Yes ☐ No If yes, ☐ doctor diagnosed  
☐ self-diagnosed  
☐ doctor- and self-diagnosed

If yes, how old were you at the onset of your allergic rhinitis/ hayfever? \_\_\_\_\_years

---

32 Has the father **ever** had **eczema** (excluding contact dermatitis and psoriasis)?

☐ Yes ☐ No If yes, ☐ doctor diagnosed  
☐ self-diagnosed  
☐ doctor- and self-diagnosed

If yes, how old was he at the onset of his eczema? \_\_\_\_\_years

---

33 Has the father **ever** had **asthma**?

☐ Yes ☐ No If yes, ☐ doctor diagnosed  
☐ self-diagnose  
☐ doctor- and self-diagnosed

If yes, how old was he at the onset of his asthma? \_\_\_\_\_years

**34** Has the father **ever** had hayfever or allergic rhinitis?

- ☐ Yes      ☐ No      If yes, ☐ doctor diagnosed  
☐ self-diagnosed  
☐ doctor- and self-diagnosed

If yes, how old were you at the onset of your allergic rhinitis/ hayfever? \_\_\_\_\_ years

## V) NUTRITION

## Core Questions

**35** Has your child ever had an allergic reaction to food?

- ☐ Yes ☐ No

**If yes, has your child ever had an allergic reaction caused by...**  
(You may choose several answers.)

36 Cow's milk

- ☐ Yes    ☐ No    Please describe the allergic reaction \_\_\_\_\_

How old was your child when the allergic reaction to cow's milk first occurred? \_\_\_\_\_ years

Does your child still have this allergic reaction when eating the food item?

- ☐ Yes      ☐ No      ☐ I don't know

37 Hen's egg

- ☐ Yes    ☐ No    Please describe the allergic reaction \_\_\_\_\_

How old was your child when the allergic reaction to hen's egg first occurred? \_\_\_\_\_ years

Does your child still have this allergic reaction when eating the food item?

- ☐ Yes      ☐ No      ☐ I don't know

## 38 Wheat

- ☐ Yes    ☐ No    Please describe the allergic reaction \_\_\_\_\_

How old was your child when the allergic reaction to wheat first occurred? \_\_\_\_\_ years

Does your child still have this allergic reaction when eating the food item?

- ☐ Yes      ☐ No      ☐ I don't know



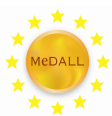**39 Soy**

☐ Yes    ☐ No    Please describe the allergic reaction \_\_\_\_\_

How old was your child when the allergic reaction to soy first occurred? \_\_\_\_\_ years

Does your child still have this allergic reaction when eating the food item?

☐ Yes    ☐ No    ☐ I don't know

---

**40 Codfish**

☐ Yes    ☐ No    Please describe the allergic reaction \_\_\_\_\_

How old was your child when the allergic reaction to codfish first occurred? \_\_\_\_\_ years

Does your child still have this allergic reaction when eating the food item?

☐ Yes    ☐ No    ☐ I don't know

---

**41 Peanut**

☐ Yes    ☐ No    Please describe the allergic reaction \_\_\_\_\_

How old was your child when the allergic reaction to peanut first occurred? \_\_\_\_\_ years

Does your child still have this allergic reaction when eating the food item?

☐ Yes    ☐ No    ☐ I don't know

---

**42 Tree nut**

Yes    No    Please describe the allergic reaction \_\_\_\_\_

How old were you when the allergic reaction to peanut first occurred? \_\_\_\_\_ years

Do you still have this allergic reaction when eating the food item?

☐ Yes    ☐ No    ☐ I don't know

---

**43** If other food items have caused reaction, please specify food item:

\_\_\_\_\_

Please describe the allergic reaction \_\_\_\_\_

How old was your child when the allergic reaction to the food item first occurred? \_\_\_\_\_ years

Does your child still have this allergic reaction when eating the food item?

☐ Yes    ☐ No    ☐ I don't know



**44** If other food items have caused reaction, please specify food item:

\_\_\_\_\_

Please describe the allergic reaction \_\_\_\_\_

How old was your child when the allergic reaction to the food item first occurred? \_\_\_\_\_ years

Does your child still have this allergic reaction when eating the food item?

☐ Yes    ☐ No    ☐ I don't know

---

If other food items have caused reaction, please specify food item:

\_\_\_\_\_

**45** Please describe the allergic reaction \_\_\_\_\_

How old was your child when the allergic reaction to the food item first occurred? \_\_\_\_\_ years

Does your child still have this allergic reaction when eating the food item?

☐ Yes    ☐ No    ☐ I don't know

---

## **VI) INDOOR ENVIRONMENT**

### **Core Questions**

---

**46** Do you use gas for cooking?

☐ Yes    ☐ No

---

**47** Would you consider your house or flat as damp?

☐ Yes    ☐ No

---

**48** Is there mould or are there mould stains within your dwelling (except on food)?

☐ Yes    ☐ No

If yes, in which rooms of your house or flat?

- ☐ Room or bedroom of the child
  - ☐ Rest of the flat
  - ☐ Basement
- 

**49** Does the child's mother smoke inside the home?

☐ Yes    ☐ No    If yes, number of cigarettes per day: \_ \_

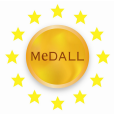

**50** Does the child's father smoke inside the home?

☐ Yes    ☐ No    If yes, number of cigarettes per day: \_ \_

---

**51** Do others (except the child) smoke inside the home?

☐ Yes    ☐ No    If yes, number of cigarettes per day: \_ \_

---

**52** Does the child smoke?

☐ Yes    ☐ No    If yes, number of cigarettes per day: \_ \_
