# Supplementary material
Source: publisher figshare collection journal article supplement (https://karger.figshare.com/articles/dataset/_/4748059)
Supplement: Supplementary file 2 [file 1]

# MeDALL

## Mechanism of the Development of Allergy

Detailed References for the Items of the MeDALL Core Questionnaires

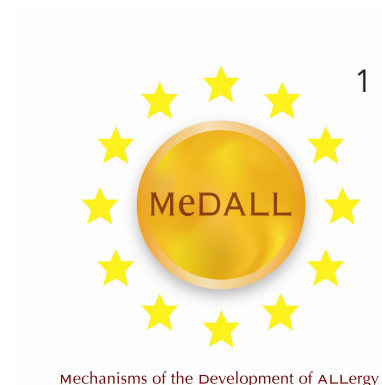

1

### **Parental Core Questionnaire, 4-9 year old children**

#### ISAAC (The International Study of Asthma and Allergies in Childhood)

Asher MI, Keil U, Anderson HR, Beasley R, Crane J, Martinez F, et al.  
International Study of Asthma and Allergies in Childhood (ISAAC): rationale and methods.  
EUR RESPIR J 1995;8:483-491.

Questions 1-4, 6-8, 12, 13\*, 14, 15, 19, 20 21\*, 22, 24\*, 25

#### IPAQ (International physical activity questionnaire)

Craig CL, Marshall AL, Sjöström M, Bauman AE, Booth ML, Ainsworth BE et al.  
International physical activity questionnaire (IPAQ): 12-country reliability and validity.  
MED SCI SPORTS EXERC. 2003;35(8):1381-95.

Questions S32-S34

#### Williams Working Criteria

Williams HC, Burney PG, Pembroke AC, Hay RJ.  
The U.K. Working Party's Diagnostic Criteria for Atopic Dermatitis. III. Independent hospital validation.  
BR J. DERMATOL 1994;131(3):406-16.

Question 18

#### ALSPAC (Avon Longitudinal Study of Parents and Children)

<http://www.bristol.ac.uk/alspac/researchers/resources-available/datadetails/questionnaires/documents/ques-cb07-my3-year-old-boy.pdf>

Question 30\*

Questions stemming from former follow-ups of the MeDALL cohorts or were newly developed by a consensus of the MeDALL members

Questions 5, 9-11, 16, 17, 23, 26-56, 31 & S3, S4, S8-S11, S16-S29, S35-S38

### **Parental Core Questionnaire, about their 14-18 year old children**

#### ISAAC (The International Study of Asthma and Allergies in Childhood)

Asher MI, Keil U, Anderson HR, Beasley R, Crane J, Martinez F, et al.  
International Study of Asthma and Allergies in Childhood (ISAAC): rationale and methods.  
EUR RESPIR J 1995;8:483-491.

Questions 1, 2, 5-8, 11, 12\*, 13, 14, 19, 20\*, 21, 23, 24 & S3-S5

#### Williams Working Criteria

Williams HC, Burney PG, Pembroke AC, Hay RJ. The U.K. Working Party's Diagnostic Criteria for Atopic Dermatitis. III. Independent hospital validation.  
BR J DERMATOL 1994;131(3):406-16.

Question 18

Questions stemming from former follow-ups of the MeDALL cohorts or were newly developed by a consensus of the MeDALL members

Questions 3, 4, 9, 10, 15-17, 22, 25-50 & S1, S2, S6, S7

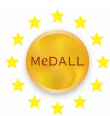**Adolescent Core Questionnaire, 14-18 years****ARIA (Allergic rhinitis and its impact on asthma)**

Bousquet J, van Cauwenberge P, Khaltaev N, in collaboration with the World Health Organization. Allergic Rhinitis and its Impact on Asthma.

J ALLERGY CLIN IMMUNOL 2001;108(5, SUPPL): 147-334.

Questions S11-S14

**EPOS (European position paper on rhinosinusitis and nasal polyps)**

Fokkens W, Lund V, Mullol J; European Position Paper on Rhinosinusitis and Nasal Polyps group. Chronic Rhinosinusitis with or without nasal polyps (CRSwNP or CRSsNP).

RHINOL SUPPL. 23; 2012; 50:1-298.

Fokkens W, Lund V, Mullol J, on behalf of the European Position Paper on Rhinosinusitis and Nasal Polyps group. EP3OS 2007: European position paper on rhinosinusitis and nasal polyps 2007. A summary for otorhinolaryngologists.

RHINOL 2007;45, 97-101

Retrieved via <http://www.nhlbi.nih.gov/guidelines/asthma/asthgdln.pdf> [accessed 20th Aug2012].

Questions 17-24

**ISAAC (The International Study of Asthma and Allergies in Childhood)**

Asher MI, Keil U, Anderson HR, Beasley R, Crane J, Martinez F, et al.

International Study of Asthma and Allergies in Childhood (ISAAC): rationale and methods.

EUR RESPIR J 1995;8:483-491.

Questions 1, 2, 4-7, 10, 11\*, 12, 13, 26, 27\*, 28-30 & S2\*-S5\*, S8-S10

**IPAQ (International physical activity questionnaire)**

Craig CL, Marshall AL, Sjöström M, Bauman AE, Booth ML, Ainsworth BE et al.

International physical activity questionnaire (IPAQ): 12-country reliability and validity.

MED SCI SPORTS EXERC. 2003;35(8):1381-95.

Questions 51-54

**PDS (Pubertal Development Scale)**

Carskadon MA, Acebo C. A self-administered rating scale for pubertal development.

JAH 1993;14:190-195.

Questions 63-69

**POEM (Patient-Oriented Eczema Measure)**

Charman CR, Venn AJ, Williams HC. The Patient-Oriented Eczema Measure development and initial validation of a new tool for measuring atopic eczema severity from the patients' perspective.

ARCH DERMATOL 2004;140(12):1513-1519.

Questions S15\*-S21

**VAS (Visual Analogue Scale)**

Paul-Dauphin A, Guillemin F, Virion JM, Briançon S. Bias and precision in visual analogue scales: a randomized controlled trial.

AM J EPIDEMIOL 1999;150(10):1117-27.

Questions 9\*, 15 & S7

**Williams Working Criteria**

Williams HC, Burney PG, Pembroke AC, Hay RJ. The U.K. Working Party's Diagnostic Criteria for Atopic Dermatitis. III. Independent hospital validation.

BR J DERMATOL 1994;131(3):406-16.

Question 25

**Questions stemming from former follow-ups of the MeDALL cohorts or were newly developed by a consensus of the MeDALL members**

Questions 3, 8, 14, 16, 31-48, 53-61 & S1, S6
