# Supplementary material
Source: publisher figshare collection journal article supplement (https://karger.figshare.com/articles/dataset/_/4748059)
Supplement: Supplementary file 3 [file 1]

**Online suppl. FigS1.** MeDALL Adolescent Core Questionnaire, 14-18 years.

**Online suppl. FigS2.** MeDALL Parental Core Questionnaire, 14-18 years.

**Online suppl. FigS3.** MeDALL Parental Core Questionnaire, 4-9 years.

**Online suppl. FigS4.** Detailed References for the Items of the MeDALL Core Questionnaires.
