# Supplementary material
Source: publisher figshare collection journal article supplement (https://karger.figshare.com/articles/dataset/_/4748059)
Supplement: Supplementary file 4 [file 1]

# MeDALL

## Mechanism of the Development of Allergy

Parental Questionnaire  
(for parents of 4-9 year old children)

If parts or all of this questionnaire will be used, please refer to the origins of this questionnaire in all corresponding publications (see Supplement Fig. S4).

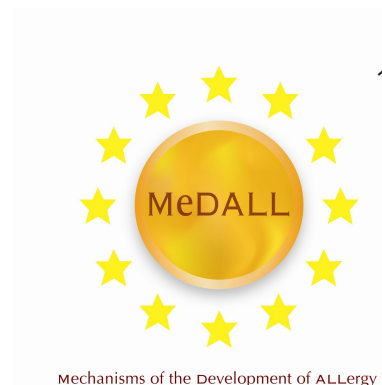

### I) Asthma/Wheezing

- 1 Has your child had wheezing or whistling in the chest **in the past 12 months**?  
☐ Yes ☐ No
- 2 How many attacks of wheezing has your child had **in the past 12 months**?  
☐ None  
☐ 1 to 3  
☐ 4 to 12  
☐ More than 12
- 3 Has your child had breathing difficulties (chest tightness, shortness of breath) **in the past 12 months**?  
☐ Yes ☐ No
- 4 **In the past 12 months**, has your child had a **dry cough at night**, apart from a cough associated with a cold or chest infection?  
☐ Yes ☐ No
- 5 Has your child **ever** been diagnosed by a doctor as having asthma?  
☐ Yes ☐ No
- 6 In the **past 12 months**, how often, on average, has your child's **sleep** been disturbed due to wheezing?  
☐ Never woken with wheezing  
☐ Less than one night per week  
☐ One or more nights per week
- 7 **In the past 12 months**, has wheezing ever been severe enough to limit your child's **speech** to only one or two words at a time between breaths?  
☐ Yes ☐ No
- 8 **In the past 12 months**, has your child's chest sounded wheezy during or after **exercise**?  
☐ Yes ☐ No

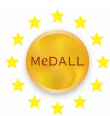

**9** In the past 12 months, how often has your child been disturbed by coughing/ wheezing/ whistling/ difficulty breathing when doing **exercise**?

- ☐ Never
  - ☐ Hardly ever
  - ☐ Less than half of the times
  - ☐ More than half of the times
  - ☐ Always or almost always (includes no exercising at all due to symptoms)
  - ☐ Does not make exercise due to other reasons
- 

**10** Has your child taken any medicines for asthma or breathing difficulties (chest tightness, shortness of breath) **in the last 12 months**? (include any inhalers, nebulisers, tablets or liquid medicines)

- ☐ Yes      ☐ No
  - ☐ If yes, which? \_\_\_\_\_
- 

**11** How often did you have to see a doctor or attend a hospital with your child **urgently** because of breathing difficulties (wheezing, chest tightness, shortness of breath) **in the last 12 months**?

Number: \_\_\_\_\_

---

### Supplemental Questions

**S1** Has your child ever had wheezing or whistling in the chest **at any time in the past**?

- ☐ Yes      ☐ No
  - ☐ If yes at what age did it occur? \_\_\_\_ months/years
- 

**S2** In which month/s did this wheezing or whistling in the chest occur **in the past 12 months**? (You may choose several answers)

- |                                |                             |                                 |                                |
|--------------------------------|-----------------------------|---------------------------------|--------------------------------|
| <input type="radio"/> January  | <input type="radio"/> April | <input type="radio"/> July      | <input type="radio"/> October  |
| <input type="radio"/> February | <input type="radio"/> May   | <input type="radio"/> August    | <input type="radio"/> November |
| <input type="radio"/> March    | <input type="radio"/> June  | <input type="radio"/> September | <input type="radio"/> December |
- 

**S3** In the past 12 months, which of these factors do you think triggered your child's wheezing or whistling in the chest? (You might choose several answers. )

- |                                                                |                                                     |
|----------------------------------------------------------------|-----------------------------------------------------|
| <input type="radio"/> Weather change (coldness, fog)           | <input type="radio"/> Tobacco smoke                 |
| <input type="radio"/> Pollen                                   | <input type="radio"/> Emotion, stress               |
| <input type="radio"/> Gas exhaust, vapours, fumes              | <input type="radio"/> Tears, laughter, excitement   |
| <input type="radio"/> Dust                                     | <input type="radio"/> Wool clothes                  |
| <input type="radio"/> Pets                                     | <input type="radio"/> Food or drink                 |
| <input type="radio"/> Cold, flu or other respiratory infection | <input type="radio"/> Soap, spray, cleaning product |
| <input type="radio"/> Strong odours                            | <input type="radio"/> Exercise (during or after)    |
| <input type="radio"/> Other (please specify): _____            |                                                     |

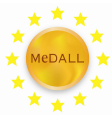

---

**S4** In the past 12 months, how much did this wheezing interfere with your child's daily activities?

- ☐ Not at all
  - ☐ A moderate amount
  - ☐ A little
  - ☐ A lot
- 

**S5** Has your child had this wheezing or whistling in the chest been accompanied by an attack of breathlessness (dyspnoea) at least once **in the past 12 months**?

- ☐ Yes
  - ☐ No
- 

**S6** In the past 12 months, how many attacks of breathlessness has your child had?

- ☐ None
  - ☐ 1 to 3
  - ☐ 4 to 12
  - ☐ More than 12
- 

**S7** Has your child's sleep been disturbed due to an attack of breathlessness (dyspnoea) **in the past 12 months**?

- ☐ Yes
- ☐ No

If yes how often?

- ☐ Never woken with breathlessness
  - ☐ Less than one night per week
  - ☐ One or more nights per week
- 

**S8** If your child has had a dry cough at night and has been given bronchodilators (asthma relieving/ air passage widening medication) the effect of this medication on cough has been

- ☐ Rapid improvement (less than 30 minutes) although it could fade with time
  - ☐ Slow improvement (takes hours or days)
  - ☐ No improvement
  - ☐ Not used bronchodilators
- 

**S9** Have you ever given your child inhaled steroids?

- ☐ Yes
- ☐ No

If yes, how old was your child when s/he received inhaled steroids for the first time? \_\_\_\_

On average, how long did you give him (her) inhaled steroids since birth?

Specify the number of weeks: \_\_\_\_

---

**S10** In the past 12 months, did you give your child oral steroids?

- ☐ Yes
- ☐ No



**S11** Has your child **ever** been treated for **wheezing/breathing difficulties** with homoeopathy or acupuncture?

☐ Yes ☐ No

---

### **Cough and Phlegm**

**S12** **In the past 12 months**, has your child usually seemed congested in the chest or coughed up phlegm (mucus) with colds?

☐ Yes ☐ No

---

**S13** **In the past 12 months**, has your child usually seemed congested in the chest or coughed up phlegm (mucus) when s/he did not have a cold?

☐ Yes ☐ No

---

**S14** **In the past 12 months**, does your child seem congested in the chest or cough up phlegm (mucus) on most days (4 or more days a week) for as much as 3 months of the year?

☐ Yes ☐ No

---

**S15** **In the past 12 months** has your child usually seemed congested in the chest or coughed up phlegm on most days (4 or more day a week) when s/he did not have a cold?

- ☐ No  
☐ Yes, for less than 1 month a year  
☐ Yes, for 1 or 2 months a year  
☐ Yes, for 3 months a year or more
- 

**S16** **In the past 12 months** has a doctor said that your child has had a chest infection?

☐ Yes ☐ No



## II) RHINITIS

- 12** In the **past 12 months**, has your child had problems with sneezing, or a runny, or blocked nose when he/she DID NOT have a cold or the flu?
- ☐ Yes ☐ No
- 
- 13** If yes, please specify which of the symptoms your child had **in the past 12 months** when he/she DID NOT have a cold or the flu. (You may choose several answers) Please tick all items that apply:
- |              |                           |                          |
|--------------|---------------------------|--------------------------|
| sneezing     | <input type="radio"/> Yes | <input type="radio"/> No |
| runny nose   | <input type="radio"/> Yes | <input type="radio"/> No |
| blocked nose | <input type="radio"/> Yes | <input type="radio"/> No |
- 
- 14** If yes, **in the past 12 months**, has this nose problem been accompanied by itchy-watery eyes?
- ☐ Yes ☐ No
- 
- 15** In which of the **past 12 months** did this nose problem occur? (You may choose several answers) Please tick all months that apply:
- |                                |                             |                                 |                                |
|--------------------------------|-----------------------------|---------------------------------|--------------------------------|
| <input type="radio"/> January  | <input type="radio"/> April | <input type="radio"/> July      | <input type="radio"/> October  |
| <input type="radio"/> February | <input type="radio"/> May   | <input type="radio"/> August    | <input type="radio"/> November |
| <input type="radio"/> March    | <input type="radio"/> June  | <input type="radio"/> September | <input type="radio"/> December |
- 
- 16** In the **past 12 months**, did your child have trouble with the nose or eyes (without having a cold) in association with one of the following? (You may choose several answers) Please tick all items that apply:
- |                                             |                           |                          |                                  |
|---------------------------------------------|---------------------------|--------------------------|----------------------------------|
| <input type="radio"/> animals, dust, mites  | <input type="radio"/> Yes | <input type="radio"/> No | <input type="radio"/> Don't know |
| <input type="radio"/> grass, trees, flowers | <input type="radio"/> Yes | <input type="radio"/> No | <input type="radio"/> Don't know |
| <input type="radio"/> tobacco smoke         | <input type="radio"/> Yes | <input type="radio"/> No | <input type="radio"/> Don't know |
| <input type="radio"/> housedust             | <input type="radio"/> Yes | <input type="radio"/> No | <input type="radio"/> Don't know |
| <input type="radio"/> air pollutants        | <input type="radio"/> Yes | <input type="radio"/> No | <input type="radio"/> Don't know |
- (e.g. gas exhaust, vapours, fumes, spray, cleaning products, heavy scent)
- ☐ other, please specify \_\_\_\_\_
- 
- 17** Did your child take any medications, tablets, nasal sprays or eye drops against nasal allergy/hay fever **in the past 12 months**?
- ☐ Yes ☐ No If yes, which? \_\_\_\_\_
- 
- Has your child ever been diagnosed by a physician with having allergic rhinitis (rhinitis to cat, dust...) or hay fever (rhinitis to pollens)?
- ☐ Yes ☐ No

**Supplemental Questions**

**S17** Has your child ever been treated for **nasal allergy/hay fever** with homoeopathy or acupuncture?

☐ Yes ☐ No

---

**S18** **In the past 12 months**, how often has your child been disturbed by a runny/itchy/ blocked nose or itchy/watery/red eyes in the following activities?

|                                           |                             |                                         |                                  |                                        |
|-------------------------------------------|-----------------------------|-----------------------------------------|----------------------------------|----------------------------------------|
| <input type="radio"/> Sleep:              | <input type="radio"/> Never | <input type="radio"/> very occasionally | <input type="radio"/> frequently | <input type="radio"/> most of the time |
| <input type="radio"/> School/homework:    | <input type="radio"/> Never | <input type="radio"/> very occasionally | <input type="radio"/> frequently | <input type="radio"/> most of the time |
| <input type="radio"/> Outdoor activities: | <input type="radio"/> Never | <input type="radio"/> very occasionally | <input type="radio"/> frequently | <input type="radio"/> most of the time |

---

**III) ATOPIC DERMATITIS OR ECZEMA****Core Questions**

**18** Has your child had dry skin **in the past 12 months**?

☐ Yes ☐ No

---

**19** Has your child **ever** had an itchy rash which was coming and going for at least 6 months?

☐ Yes ☐ No

---

**20** Has your child had an itchy rash which was intermittently coming and going at any time **in the past 12 months**?

☐ Yes ☐ No

---

**21** Has this itchy rash at any time affected any of the following places (You may choose several answers)? Please tick all that apply:

- ☐ the folds of the elbows
  - ☐ behind the knees
  - ☐ in front of the ankles
  - ☐ under the buttocks
  - ☐ or around the neck, ears or face
- 

**22** Has this rash cleared completely at any time **during the past 12 months**?

☐ Yes ☐ No

---

**23** Has your child **ever** been diagnosed by doctor with having eczema /atopic dermatitis?

☐ Yes ☐ No

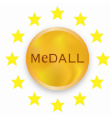

**24** In which of **the past 12 months** did your child's eczema/itchy rash occur? (You may choose several answers) Please tick all months that apply:

- |                                |                             |                                 |                                |
|--------------------------------|-----------------------------|---------------------------------|--------------------------------|
| <input type="radio"/> January  | <input type="radio"/> April | <input type="radio"/> July      | <input type="radio"/> October  |
| <input type="radio"/> February | <input type="radio"/> May   | <input type="radio"/> August    | <input type="radio"/> November |
| <input type="radio"/> March    | <input type="radio"/> June  | <input type="radio"/> September | <input type="radio"/> December |
- 

**25** In the past 12 months, how often, on average, has your child been kept awake at night by this itchy rash?

- ☐ Never in the past 12 months  
☐ Less than one night per week  
☐ One or more nights per week
- 

### Contact Dermatitis

**26** Has your child **ever** had eczema on her/his hands (itchy lesions, blisters, rash)?

- ☐ Yes      ☐ No

If yes, at which age was the onset? \_ \_ years

---

**27** Has your child **ever** had eczema after contact with (You may choose several answers, please tick all items that apply):

- ☐ items of metal (e.g. button, buckle, zipper, belt, watch or watchstrap, glasses or sunglasses, hair slide, cell phone, headset): please specify \_\_\_\_\_  
☐ fashion jewellery (earrings, rings...)  
☐ colorants  
☐ cosmetics, perfume or fragrances  
☐ shampoo or conditioner  
☐ soap  
☐ clothes  
☐ latex, rubber (e.g. rubber gloves, balloons)  
  
☐ other materials, please specify: \_\_\_\_\_  
  
☐ **no**, not with any material
- 

### Optional Supplemental Questions

#### Severity of Eczema

**S19** Has your child **ever** been treated for eczema/atopic dermatitis with homoeopathy or acupuncture?

- ☐ Yes      ☐ No



## IV) FOOD ALLERGIC REACTIONS

### Core Questions

- 28** Has your child ever had one or several abnormal reactions after eating a particular **food**?
- ☐ Yes ☐ No If yes, please tick any which apply. **See table on page 10!**
- 
- 29** How old was your child when the allergic reaction first occurred? \_\_\_\_\_ years
- 
- 30** Does your child still have this allergic reaction when eating the food item?
- ☐ Yes ☐ No ☐ I don't know
- 
- 31** **In the last 12 months**, how often has your child been seen by a doctor for food reaction, **other than during or immediately after an actual episode**? (Please tick any which apply)
- |                                                                | Never                 | 1 to 3                | 4 to 12               | More than 12          |
|----------------------------------------------------------------|-----------------------|-----------------------|-----------------------|-----------------------|
| - Yes, by a general practitioner or a pediatrician             | <input type="radio"/> | <input type="radio"/> | <input type="radio"/> | <input type="radio"/> |
| - Yes, by a pulmonologist or an allergist (hospital or office) | <input type="radio"/> | <input type="radio"/> | <input type="radio"/> | <input type="radio"/> |
| - Other (please specify): _____                                |                       |                       |                       |                       |
- 
- 32** **In the last 12 months**, how often has your child been hospitalized due to adverse food reactions?
- \_\_\_\_\_ time(s) (If «no hospitalization», answer 0)
- 
- 33** Did your child **ever** receive special injections or other treatments against allergy ("allergy vaccine"), immunotherapy, hyposensitisation or desensitisation?
- ☐ Yes ☐ No If yes, which allergen and when? \_\_\_\_\_

### Supplemental Questions

- S20** If yes, first treatment started at age \_\_ years and ended at \_\_ years
- Against which allergen(s) \_\_\_\_\_ ☐ Not known
- Second treatment started at age \_\_ years and ended at \_\_ years
- Against which allergen(s) \_\_\_\_\_ ☐ Not known
- Third treatment started at age \_\_ years and ended at \_\_ years
- Against which allergen(s) \_\_\_\_\_ ☐ Not known
- (Cohorts that have asked this previously, should ask "since last follow-up" instead of "ever".)





---

**Allergic reactions to medicine**

**34** Has your child ever had one or several abnormal reactions after taking a particular **medicine**?

☐ Yes ☐ No If yes, please tick all that apply. **See table on page 10!**

---

**35** In the last 12 months, how often has your child been seen by a doctor for reactions to drugs, **other than during or immediately after an actual episode**? (Please tick any which apply)

|                                                              | Never                 | 1 to 3                | 4 to 12               | More than 12          |
|--------------------------------------------------------------|-----------------------|-----------------------|-----------------------|-----------------------|
| Yes, by a general practitioner or a pediatrician             | <input type="radio"/> | <input type="radio"/> | <input type="radio"/> | <input type="radio"/> |
| Yes, by a pulmonologist or an allergist (hospital or office) | <input type="radio"/> | <input type="radio"/> | <input type="radio"/> | <input type="radio"/> |
| Other (please specify): _____                                |                       |                       |                       |                       |

---

**36** In the last 12 months, how often has your child been hospitalized due to adverse food reactions?  
\_\_\_\_\_ time(s) (If «no hospitalization», answer 0)

---

**Allergic reactions to a vaccine**

**37** Has your child ever had one or several abnormal reactions after eating a particular **vaccination**?

☐ Yes ☐ No If yes, please tick any which apply. **See table on page 10!**

---

**38** In the last 12 months, how often has your child been seen by a doctor for reactions to a vaccine, **other than during or immediately after an actual episode**? (Please tick any which apply)

|                                                              | Never                 | 1 to 3                | 4 to 12               | More than 12          |
|--------------------------------------------------------------|-----------------------|-----------------------|-----------------------|-----------------------|
| Yes, by a general practitioner or a pediatrician             | <input type="radio"/> | <input type="radio"/> | <input type="radio"/> | <input type="radio"/> |
| Yes, by a pulmonologist or an allergist (hospital or office) | <input type="radio"/> | <input type="radio"/> | <input type="radio"/> | <input type="radio"/> |
| Other (please specify): _____                                |                       |                       |                       |                       |

---

**39** In the last 12 months, how often has your child been hospitalized due to adverse vaccine reactions?

\_\_\_\_\_ time(s) (If «no hospitalization», answer 0)

|                                |        |
|--------------------------------|--------|
| Allergic reactions to food     | No. 28 |
| Allergic reactions to medicine | No. 34 |
| Allergic reactions to vaccine  | No. 37 |

[illegible]

**V) SOCIODEMOGRAPHIC CHARACTERISTICS**

**40** Your child is

☐ male ☐ female

---

**41** What is your child's height? \_\_\_\_ cm

What is your child's weight? \_\_\_\_ kg

---

**42** Are you:

☐ Married (First marriage) ☐ Separated (but still legally married)  
☐ Married (Second marriage) ☐ Divorced  
☐ Single (never married) ☐ Widowed

---

**43** Are you:

☐ Living with baby's other parent (father mother)  
☐ Living with another partner  
☐ Not living with a partner - but in a relationship  
(eg partner living abroad or in another property)  
☐ Not living with a partner and not in a relationship

---

**44** Has the mother **ever** had **eczema** (excluding contact dermatitis and psoriasis)?

☐ Yes ☐ No If yes, ☐ doctor diagnosed  
☐ self-diagnosed  
☐ doctor- and self-diagnosed

If yes, how old were you at the onset of your **eczema**? \_\_\_\_ years

---

**45** Has the mother **ever** had **asthma**?

☐ Yes ☐ No If yes, ☐ doctor diagnosed  
☐ self-diagnosed  
☐ doctor- and self-diagnosed

If yes, how old were you at the onset of your asthma? \_\_\_\_ years

---

**46** Has the mother **ever** had hayfever or **allergic rhinitis**?

☐ Yes ☐ No If yes, ☐ doctor diagnosed  
☐ self-diagnosed  
☐ doctor- and self-diagnosed

If yes, how old were you at the onset of your allergic rhinitis/ hayfever? \_\_\_\_ years

**47** Has the biological father **ever** had **eczema** (excluding contact dermatitis and psoriasis)?

- ☐ Yes      ☐ No      If yes, ☐ doctor diagnosed  
☐ self-diagnosed  
☐ doctor- and self-diagnosed

If yes, how old was he at the onset of his eczema? \_\_\_\_\_years

48 Has the biological father **ever** had **asthma**?

- ☐ Yes      ☐ No      If yes, ☐ doctor diagnosed  
☐ self-diagnose  
☐ doctor- and self-diagnosed

If yes, how old was he at the onset of his asthma? \_\_\_\_\_years

**49** Has the biological father **ever had hayfever or allergic rhinitis?**

- ☐ Yes      ☐ No      If yes, ☐ doctor diagnosed  
☐ self-diagnosed  
☐ doctor- and self-diagnosed

If yes, how old were you at the onset of your allergic rhinitis/ hayfever? \_\_\_\_\_years

## Supplemental Questions

**S21** Since the last questionnaire, have you, or has a close relative been affected by:

- Serious health problems (e.g. chronic disease, depression, surgery, hospitalization)

Please specify the person(s) and the type of problem(s):

---

- Bereavement

**S22** Since the last questionnaire, did you move?

- ☐ Yes ☐ No

**S23** Since the last questionnaire, has there been a change in ...

- Your marital status?

- ☐ Yes, please specify: \_\_\_\_\_ ☐ No

- Your (or your partner's) occupational situation?

- ☐ Yes, please specify: \_\_\_\_\_ ☐ No

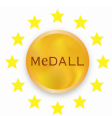

---

**S24** Since the last questionnaire, has there been a new birth in your family?

☐ Yes, please specify when: \_\_\_\_\_ ☐ No

---

## **VI) NUTRITION**

The cohort-specific Food Frequency Questionnaire for the measurement of nutrition will be used.

---

## **VII) AIR POLLUTION**

The ESCAPE measurements will be used.

---

## **VIII) INDOOR ENVIRONMENT**

### **Gas Stove**

**50** Do you use gas for cooking?

☐ Yes ☐ No

---

**51** Do you have an extractor fan over the cooker?

☐ Yes ☐ No

If Yes, when cooking do you use the fan:

- |                      |                           |                          |
|----------------------|---------------------------|--------------------------|
| a) all of the time?  | <input type="radio"/> Yes | <input type="radio"/> No |
| b) some o the time?  | <input type="radio"/> Yes | <input type="radio"/> No |
| c) none of the time? | <input type="radio"/> Yes | <input type="radio"/> No |
- 

### **Dampness and Mould**

**52** Would you consider your house or flat as damp?

☐ Yes ☐ No

---

**53** Is there mould or are there mould stains within your dwelling (except on food)?

☐ Yes ☐ No

---

**54** If yes, in which rooms of the flat or house?

- ☐ Room or bedroom of the child
- ☐ Rest of the flat
- ☐ Basement

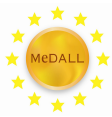**Smoking**

**55** Does the child's mother smoke inside the home?

☐ Yes ☐ No

If **occasionally**, number of cigarettes **per week** inside the home: \_\_

If **regularly (every day)**, number of cigarettes **per day** inside the home: \_\_

---

**56** Does the child's father smoke inside the home?

☐ Yes ☐ No

If **occasionally**, number of cigarettes **per week** inside the home: \_\_

If **regularly (every day)**, number of cigarettes **per day** inside the home: \_\_

---

**57** Do others (except the child) smoke inside the home?

☐ Yes ☐ No

If **occasionally**, number of cigarettes **per week** inside the home: \_\_

If **regularly (every day)**, number of cigarettes **per day** inside the home: \_\_

---

**Supplemental Questions**

**S25** Is the child's mother currently smoking?

☐ Yes ☐ No ☐ Don't know ☐ Don't answer

If occasionally, number of cigarettes \_\_\_\_\_ **per week**.

---

**S26** If yes, how many cigarettes does the child's mother smoke on average?

1. \_\_\_\_\_ cigarettes / **week**

2. \_\_\_\_\_ cigarettes / **day**

☐ Don't know ☐ Don't answer

---

**S27** Is the child's father currently smoking?

☐ Yes ☐ No ☐ Don't know ☐ Don't answer

If occasionally, number of cigarettes \_\_\_\_\_ **per week**.

---

**S28** If yes, How many cigarettes does the child's father smoke on average?

1. \_\_\_\_\_ cigarettes / **week**

2. \_\_\_\_\_ cigarettes / **day**

☐ Don't know ☐ Don't answer

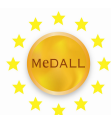

**S30** How often during a day is your child in a room or enclosed place (e.g. vehicle) where people are smoking:

**Weekdays**

- ☐ All the time  
☐ More than 5 hours  
☐ 3-5 hours  
☐ 1-2 hours  
☐ Less than 1 hour  
☐ Not at all

**Weekends**

- ☐ All the time  
☐ More than 5 hours  
☐ 3-5 hours  
☐ 1-2 hours  
☐ Less than 1 hour  
☐ Not at all

**Physical Activity** (Craig et al., 2003)

**S31** How many hours on average **per day** does your child sleep INCLUDING naps?

\_\_\_\_\_ hours

**S32** How much time on average per day does your child spend watching TV/DVDs or playing computer games? (for children aged older than 7 years)

**Weekdays**

Hours\_\_\_\_\_ Mins\_\_\_\_\_

**Weekends**

Hours\_\_\_\_\_ Mins\_\_\_\_\_

**S33** During a typical week, what type of physical activities does your child do **outside the school**? Please specify the duration of each activity **per day**.

E.g. dancing, swimming lessons or running, bicycling, skating, going to a trip, etc.  
(EXCLUDE Wii-sports and the journey to school).

\*To go to a trip (information for nurses): please count the hours that the child walks during the trip. For example, if the child goes twice a month to a trip (with his/her parents, Scouts etc) please extrapolate the hours that the child spends doing physical exercise per week. E.g. If the child walks a total of 6h (3h per two Saturdays per month) it will be counted as 1h 30 min. per week.

| Day             | Activity(es)*               | Hours      | Minutes |
|-----------------|-----------------------------|------------|---------|
| E.g.:<br>Monday | Cycling 30m<br>Swimming 30m | 0 1 2 3 4+ | 0 30    |
| Monday          |                             | 0 1 2 3 4+ | 0 30    |
| Tuesday         |                             | 0 1 2 3 4+ | 0 30    |
| Wednesday       |                             | 0 1 2 3 4+ | 0 30    |
| Thursday        |                             | 0 1 2 3 4+ | 0 30    |
| Friday          |                             | 0 1 2 3 4+ | 0 30    |
| Saturday        |                             | 0 1 2 3 4+ | 0 30    |
| Sunday          |                             | 0 1 2 3 4+ | 0 30    |



- S34** During a typical week, what type of physical activities does your child do **during school time**, excluding activities during free time in the school yard? Please specify the duration of each activity per day.

Information for nurses: physical activity includes every programmed activity from physical education, swimming to dance lessons.

| Day       | Activity/es* | Hours      | Mins |
|-----------|--------------|------------|------|
| Monday    |              | 0 1 2 3 4+ | 0 30 |
| Tuesday   |              | 0 1 2 3 4+ | 0 30 |
| Wednesday |              | 0 1 2 3 4+ | 0 30 |
| Thursday  |              | 0 1 2 3 4+ | 0 30 |
| Friday    |              | 0 1 2 3 4+ | 0 30 |
| Saturday  |              | 0 1 2 3 4+ | 0 30 |
| Sunday    |              | 0 1 2 3 4+ | 0 30 |

- S35** How much time during the day does your child spend on the schoolyard or playground?

\_\_\_\_\_ Hours

If your child has lunch at school, please include the time in hours spent on the playground or schoolyard after the meal.

\_\_\_\_\_ Hours

- S36** Do you know what kind of games does your child usually play on the playground/schoolyard?

☐ Yes ☐ No

If so, your child usually

- ☐ Sits down (taking, reading a book or playing sedentary games)  
☐ Stands around or walk around  
☐ Runs and plays a little bit  
☐ Runs and plays quite a bit  
☐ Runs and plays hard most of the time

## Immunisations and Infections

- S37** Since the last questionnaire, has your child had one or several of the following infectious diseases:

- ☐ Chickenpox ☐ Scarlet fever ☐ Exanthematic disease  
☐ Measles ☐ Mononucleosis  
☐ Mumps ☐ Morbilliform  
☐ Rubella pertussis ☐ Parotid disease

If yes, at what age? \_\_\_\_\_ years \_\_\_\_\_ months

Did this problem require, at least once, a consultation with a doctor?

☐ Yes ☐ No



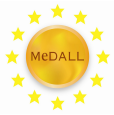

**S38** Which immunisations has your child received until now?  
*Add more rows as necessary*

| Vaccine | Date given (dd/mm/yy) |
|---------|-----------------------|
|         |                       |
|         |                       |
|         |                       |
|         |                       |
|         |                       |
